# Supplementary material for: Shape-Memory and Anisotropic Carbon Aerogel from Biomass and Graphene Oxide
Source: MDPI journal article supplement (doi:10.3390/molecules26185715), 2021-09-21
Supplement: s1 [file s1]

Supplementary Material

# Shape-Memory and Anisotropic Carbon Aerogel from Biomass and Graphene Oxide

Zilu Lin, Wenzhao Jiang, Zehong Chen, Linxin Zhong\* and Chuanfu Liu\*

State Key Laboratory of Pulp and Paper Engineering, South China University of Technology, Guangzhou 510641, China.

\* Corresponding author. E-mail: lxzhong0611@scut.edu.cn (L. Z.); chfliu@scut.edu.cn (C. L.)

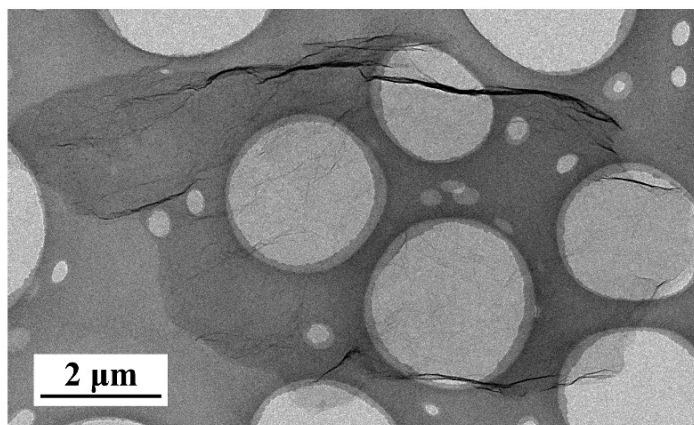

Figure S1. Transmission electron microscopy (TEM) image of GO.

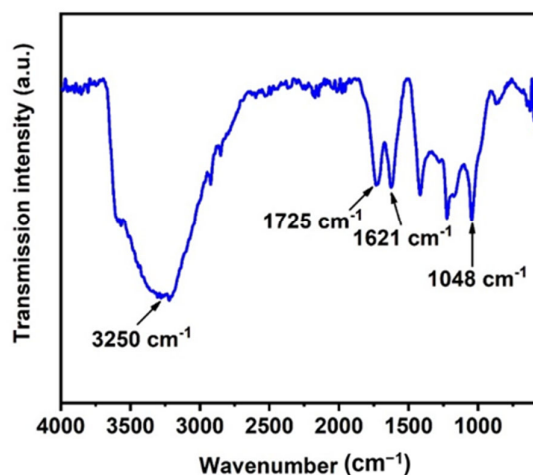

Figure S2. FTIR spectrum of GO.

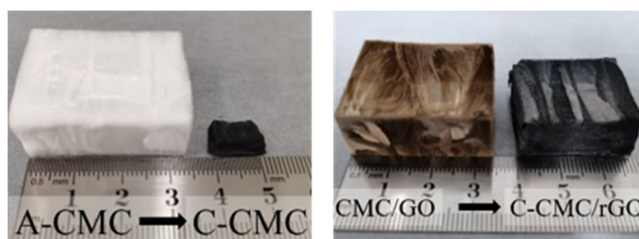

Figure S3. Digital photographs of CMC areogels and CMC/GO-4 (1.4 wt%) aerogels before and after annealing.

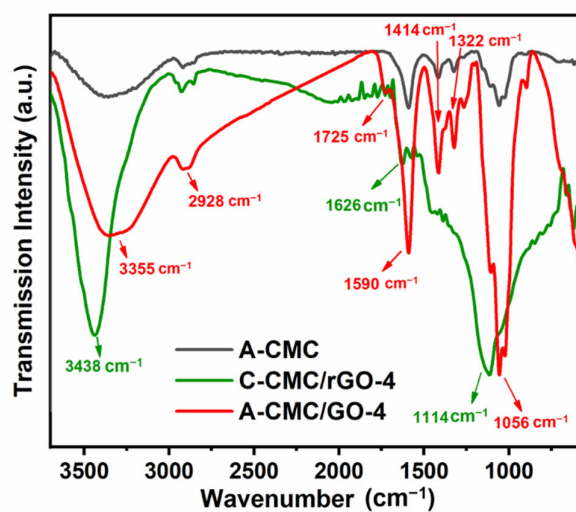

Figure S4. FTIR spectra of A-CMC, A-CMC/GO-4 (1.4 wt%) and C-CMC/rGO-4.

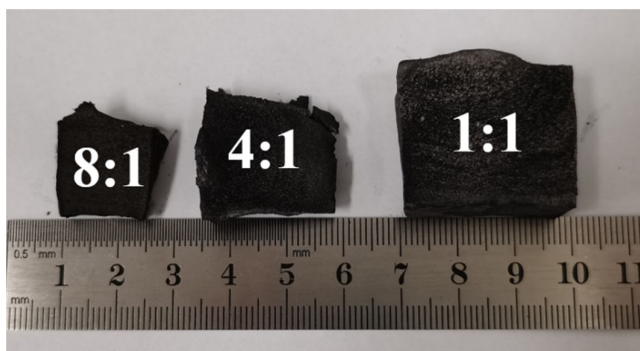

Figure S5. Digital photographs of C-CMC/rGO-1, C-CMC/rGO-4, C-CMC/rGO-8.

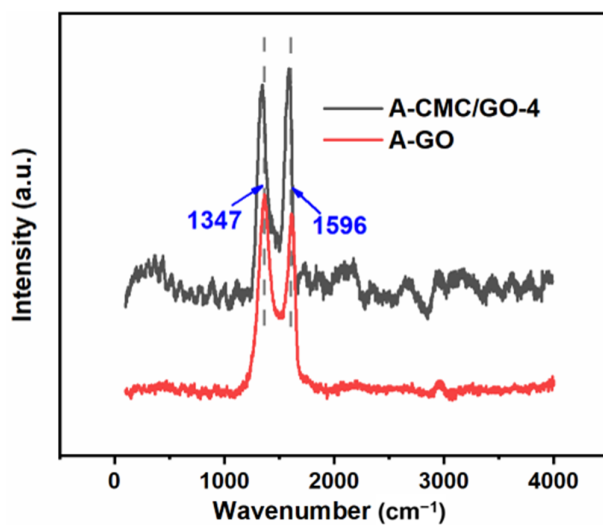

Figure S6. Raman patterns of A-CMC/rGO-4 and A-GO.

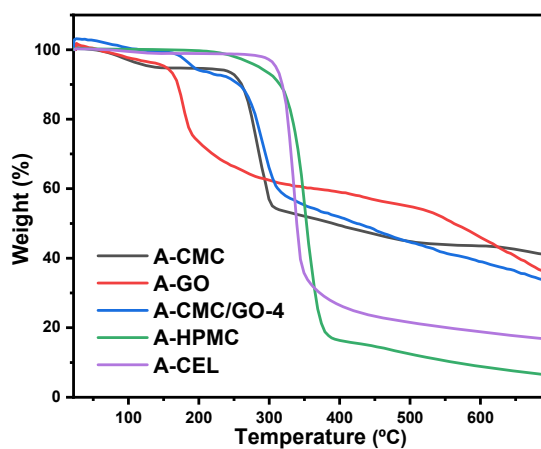

Figure S7. TGA curves of A-CMC, A-GO, A-HPMC, A-CEL, and A-CMC/GO-4.

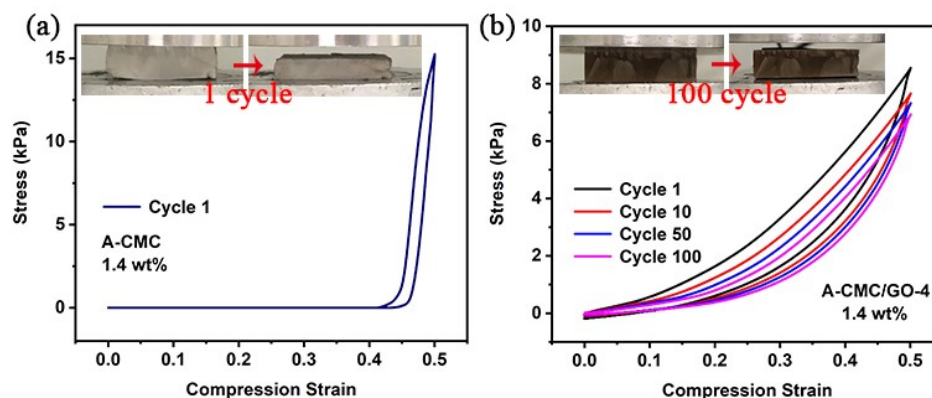

Figure S8. Stress-strain curves of (a) A-CMC and (b) A-CMC/GO-4.

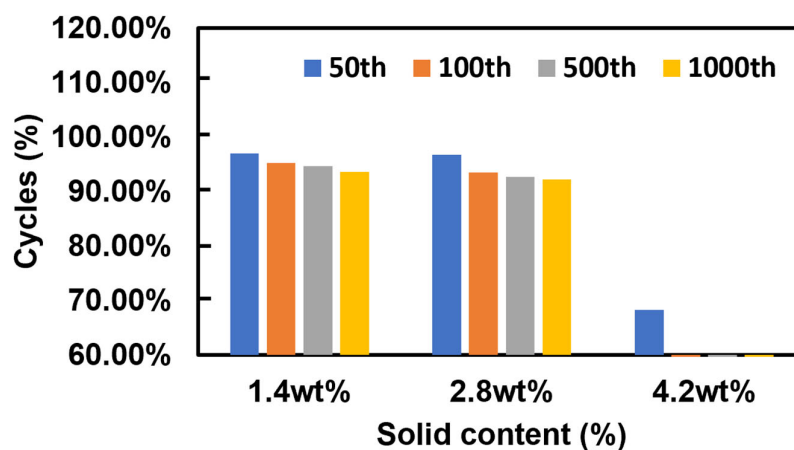

Figure S9. Stress retentions of C-CMC/rGO-4 with different solid contents at 50% strain.

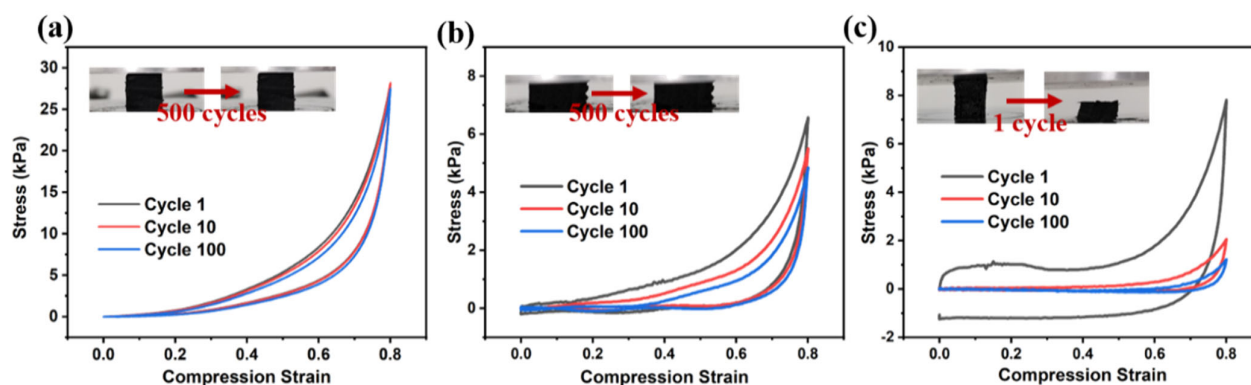

Figure S10. Stress-strain curves of C-CMC/rGO-4 from (a) the top, (b) lateral and, (c) the front.

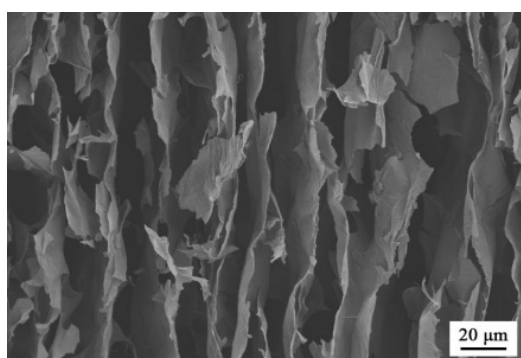

Figure S11. SEM image of C-CMC/rGO-4 with 4.2% solid content.

Table S1. BET surface area of the carbon aerogels.

| Samples                              | C-CMC/rGO-1 (1.4 wt%) | C-CMC/rGO-4 (1.4 wt%) | C-CMC/rGO-8 (1.4 wt%) | C-CMC/rGO-1 (2.8 wt%) | C-CMC/rGO-1 (4.2 wt%) |
|--------------------------------------|-----------------------|-----------------------|-----------------------|-----------------------|-----------------------|
| S <sub>BET</sub> (m <sup>2</sup> /g) | 35.7                  | 72.9                  | 179.3                 | 54.4                  | 79.6                  |

**Table S2.** The comparison of stress retention of C-CMC/rGO-4 with those of other carbon aerogels.

| Sample    | Compression strain | Cycles | Stress retention rate |
|-----------|--------------------|--------|-----------------------|
| Ref.4     | 30%                | 1000   | 93.0%                 |
| Ref.35    | 50%                | 500    | 81.0%                 |
| Ref.36    | 50%                | 1000   | 76.0%                 |
| Ref.37    | 50%                | 1000   | 96.6%                 |
|           | 100%               | 300    | 76.6%                 |
| Ref.38    | 50%                | 1000   | 75.0%                 |
| Ref.39    | 60%                | 100    | 80.0%                 |
| Ref.40    | 60%                | 1000   | 72.0%                 |
| Ref.41    | 60%                | 1000   | 60.0%                 |
| Ref.42    | 90%                | 100    | 60.0%                 |
| This work | 50%                | 50     | 97.0%                 |
|           | 50%                | 100    | 95.5%                 |
|           | 50%                | 500    | 94.7%                 |
|           | 50%                | 1000   | 93.6%                 |
